# Supplementary material
Source: PubMed Central journal article supplement (PMC4076095)
Supplement: supp_M049791_jlr.M049791-1.pdf [file supp_M049791_jlr.M049791-1.pdf]

Supplemental Table 1. Sequences and annealing temperatures (only for qPCR) of the primer pairs used and accession numbers of the sequences used as references for primer design in the cloning of *Chirostoma estor fads2* (isoforms a and b) and *elovl5* cDNA sequences, and for quantitative real-time PCR (qPCR) analysis of gene expression in selected tissues.

| Aim         | Transcript    | Primer | Primer sequence                          | Annealing temperature (°C) | Accession No <sup>1</sup> . |
|-------------|---------------|--------|------------------------------------------|----------------------------|-----------------------------|
| 5' RACE PCR | <i>fads2a</i> | CEFaR1 | 5'-CTGGCTGGACTCTGTCTGC-3'                |                            | KJ417838                    |
|             |               | CEFaR2 | 5'-TGCACGAACTTCTGATCAGG-3'               |                            |                             |
|             | <i>elovl5</i> | CEE5R1 | 5'-GCTCTTCATGTACTTGGGCC-3'               |                            | KJ417837                    |
|             |               | CEE5R2 | 5'-TAAGTGCAAAGGTTGGAGGG-3'               |                            |                             |
| 3' RACE PCR | <i>fads2a</i> | CEFaF1 | 5'-GCTCGTTGGCTCTCATGACA-3'               |                            | KJ417838                    |
|             |               | CEFaF2 | 5'-GATCATGAGCGAAAGCAGG-3'                |                            |                             |
|             | <i>fads2b</i> | CEFbF1 | 5'-GGCTCATTGGTGCTTATCTTC-3'              |                            | KJ417839                    |
|             |               | CEFbF2 | 5'-GGGACACAAAGACTGGTTAAGG-3'             |                            |                             |
|             | <i>elovl5</i> | CEE5F1 | 5'-GACCGCCTCTGCAGTCATAT-3'               |                            | KJ417837                    |
|             |               | CEE5F2 | 5'-GATGGCTCCTCTTCCAAACA-3'               |                            |                             |
| ORF cloning | <i>fads2a</i> | CEFVF  | 5'-CCCAAGCTTACGATGGGAGGTGGAGG-3'         |                            | KJ417838                    |
|             |               | CEFaVR | 5'-CCGGAGCTCCGGTCATTTATGAAGATATGCG-3'    |                            |                             |
|             | <i>fads2b</i> | CEFVF  | 5'-CCCAAGCTTACGATGGGAGGTGGAGG-3'         |                            | KJ417839                    |
|             |               | CEFbVR | 5'-CCGGAGCTCTCATTATGGAGATATGCATCC-3'     |                            |                             |
|             | <i>elovl5</i> | CEE5VF | 5'-CCCAAGCTTAAAATGGAGACCTTCAACAACAATC-3' |                            | KJ417837                    |
|             |               | CEE5VR | 5'-CCGGAGCTCTCAATCCACTCTCAGCTTCT-3'      |                            |                             |
| qPCR        | <i>fads2a</i> | qCEFaF | 5'-TGCATTCTGCTTTTGCAACT-3'               | 60                         | KJ417838                    |
|             |               | qCEFaR | 5'-CGTCCCACAAGAACAAAAGG-3'               |                            |                             |
|             | <i>fads2b</i> | qCEFbF | 5'-GTTGCATGGGAAGACCGTTT-3'               | 55                         | KJ417839                    |
|             |               | qCEFbR | 5'-ATATGCTCGAAAAGCCGATG-3'               |                            |                             |

|                                |        |                             |    |          |
|--------------------------------|--------|-----------------------------|----|----------|
| <i>elov15</i>                  | qCEE5F | 5'-AATGCTGCAAAAAGGAAGTGC-3' | 60 | KJ417837 |
|                                | qCEE5R | 5'-CGCTTTGGATAAAAAGCGTGT-3' |    |          |
| <i>ef-1<math>\alpha</math></i> | qCEEFF | 5'-CGTTGGTGTCAACAAGATGG-3'  | 60 | KJ439615 |
|                                | qCEEFR | 5'-CTCCATGCCATCCAGAGATT-3'  |    |          |

---

<sup>1</sup> GenBank (<http://www.ncbi.nlm.nih.gov/>)
